# Supplementary material
Source: MDPI journal article supplement (https://www.mdpi.com/2073-4395/11/5/860)
Supplement: s1 [file s1]

# The Effect of Diffuse Film Covers on Microclimate and Growth and Production of Tomato (*Solanum lycopersicum* L.) in a Mediterranean Greenhouse

**María de los Ángeles Moreno-Teruel, Francisco Domingo Molina-Aiz,  
Araceli Peña-Fernández, Alejandro López-Martínez, Diego Luis Valera-Martínez \***

Research Centre CIAIMBITAL, University of Almería, Ctra, de Sacramento s/n. 04120 Almería, Spain;  
mamorenoteruel@ual.es (M.d.l.Á.M.-T.); fmolina@ual.es (F.D.M.-A.); apfernan@ual.es (A.P.-F.);  
alexlopez@ual.es (A.L.-M.)

\* Correspondence: dvalera@ual.es; Tel.: +34-950-01-5546

**Table S1.** Characteristics of all sensors used for the microclimate measurements.

| Parameter                                                        | Sensor                                    | Manufacturer                                       | Rank                                | Accuracy                  |
|------------------------------------------------------------------|-------------------------------------------|----------------------------------------------------|-------------------------------------|---------------------------|
| Outside climatic parameters measured at the weather station      |                                           |                                                    |                                     |                           |
| $R_o$ —Outside solar radiation                                   | Kipp Solari—MII                           | HortiMax B.V.                                      | $\pm 2000 \text{ W m}^{-2}$         | $\pm 20 \text{ W m}^{-2}$ |
| $U_o$ —Wind speed                                                | Anemometer—MII                            | (Maasdijk, Holland)                                | $0\text{--}40 \text{ m s}^{-1}$     | $\pm 5\%$                 |
| $\theta_w$ —Wind direction                                       | Vane Meteostation II                      |                                                    | $0\text{--}360^\circ$               | $\pm 5^\circ$             |
| $T_e$ —Outside temperature                                       | Pt1000 IEC 751 1/3B                       | Vaisala Oyj                                        | $-25 \text{ to } 75^\circ \text{C}$ | $\pm 0.2^\circ \text{C}$  |
| $HR_e$ —Outside humidity                                         | HUMICAP HMT100                            | (Helsinki, Finland)                                | $0\text{--}100\%$                   | $\pm 2.5\%$               |
| Data storage system                                              | MultiMa Series II                         | HortiMax B.V.                                      | Software Synopta                    |                           |
| Inside climate parameters measured by the climate control system |                                           |                                                    |                                     |                           |
| $T_i$ —Inside temperature                                        | Pt1000 Class B—EE210                      | Eleltronik Ges. M.b.H.                             | $-10 \text{ to } 60^\circ \text{C}$ | $\pm 0.5^\circ \text{C}$  |
| $HR_i$ —Inside humidity                                          | EE210                                     | (Engerwitzdorf, Austria)                           | $0\text{--}100\%$                   | $\pm 2.3\%$               |
| $R_i$ —Inside solar radiation                                    | Pyranometer SP-212                        | Apogee Instruments, Inc<br>(Logan, USA)            | $0\text{--}2000 \text{ W m}^{-2}$   | $\pm 5\%$                 |
| Inside climate parameters                                        |                                           |                                                    |                                     |                           |
| $R_{Si}$ —Inside solar radiation                                 | 2 $\times$ Pyranometers SP1110            | Campbell Scientific Spain                          | 350—1100 nm                         | $\pm 5\%$                 |
| $Q_{Si}$ —Inside PAR radiation                                   | 2 $\times$ SKP215 Quantum Sensor          | (Barcelona, Spain)                                 | 400—700 nm                          | $\pm 5\%$                 |
| $T_i$ —Inside air temperature                                    | 12 $\times$ HOBO® Pro Temp-HR U23-001     | Onset Computer Corp. (Pocasset, USA)               | $-4 \text{ to } 70^\circ \text{C}$  | $\pm 0.18^\circ \text{C}$ |
| $HR_i$ —Inside relative humidity                                 |                                           |                                                    | $0\text{--}100\%$                   | $\pm 2.5\%$               |
| $T_i$ —Inside air temperature                                    | 12 $\times$ CS215                         | Sensirion AG.                                      | $-40 \text{ to } 70^\circ \text{C}$ | $\pm 0.4^\circ \text{C}$  |
|                                                                  | Sensirion SHT75                           | (Staefa, Swizerland)                               |                                     |                           |
| $HR_i$ —Inside relative humidity                                 |                                           |                                                    | $0\text{--}100\%$                   | $\pm 2\%$                 |
| $T_c$ —Crop temperature                                          | 8 $\times$ Thermistances Betatherm 100K6A | Campbell Scientific Spain                          | $-5 \text{ to } 95^\circ \text{C}$  | $\pm 0.16^\circ \text{C}$ |
| $T_2$ —Soil temperature                                          |                                           | (Barcelona, Spain)                                 |                                     |                           |
| $q_s$ —Heat flux in the soil                                     | 2 $\times$ HFP01                          | Hukseflux Thermal Sensors B.V.<br>(Delft, Holland) | $\pm 2000 \text{ W m}^{-2}$         | $-15 \text{ to } 5\%$     |
| $C_h$ —CO <sub>2</sub> concentration                             | LCi-SD photosynthesis analyser            | ADC BioScientific Ltd. (Hertfordshire, UK)         | $0\text{--}2000 \text{ ppm}$        | 1 ppm                     |

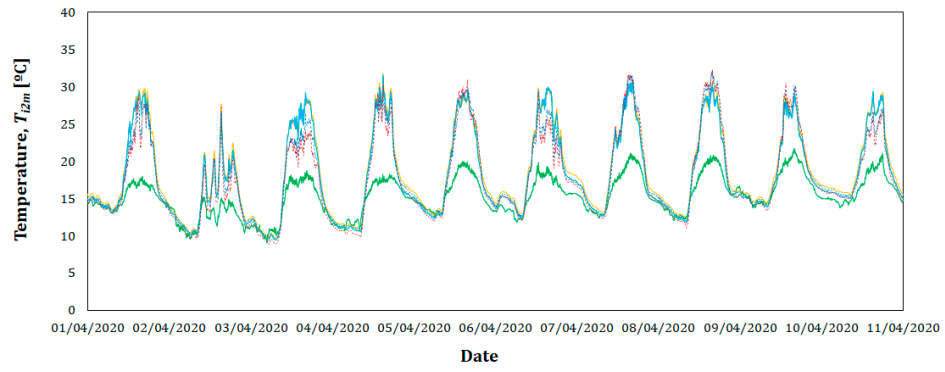

(a)

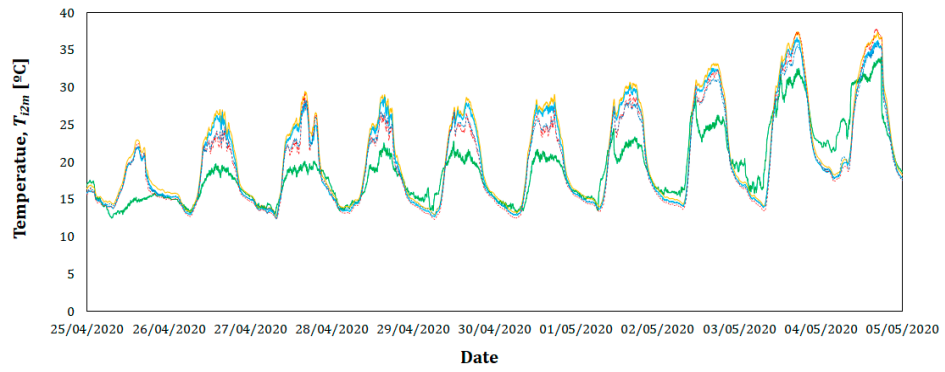

(b)

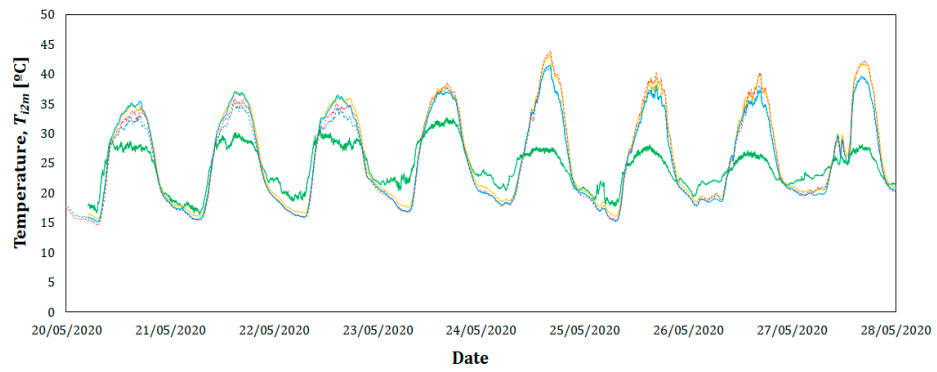

(c)

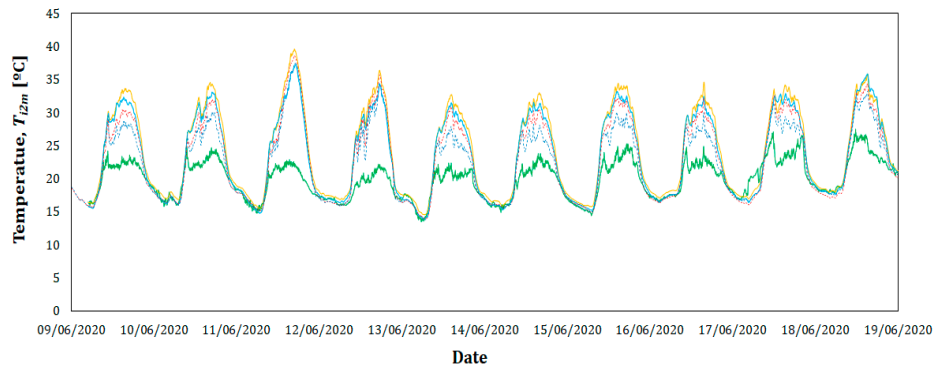

(d)

**Figure S1.** Evolution of the air temperature outside (—) and inside the East sector with diffuse commercial cover film on the North (—) and South (---) sides and inside the West sector with diffuse experimental cover film on the North (—) and South (---) sides at a height of 2 m above the floor.

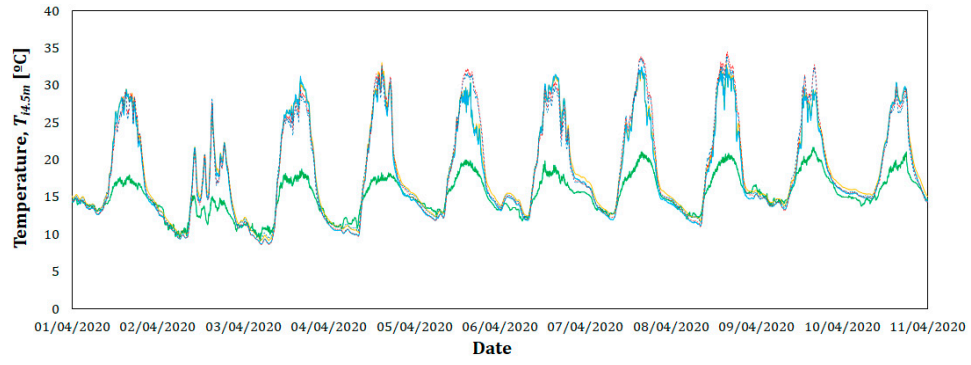

(a)

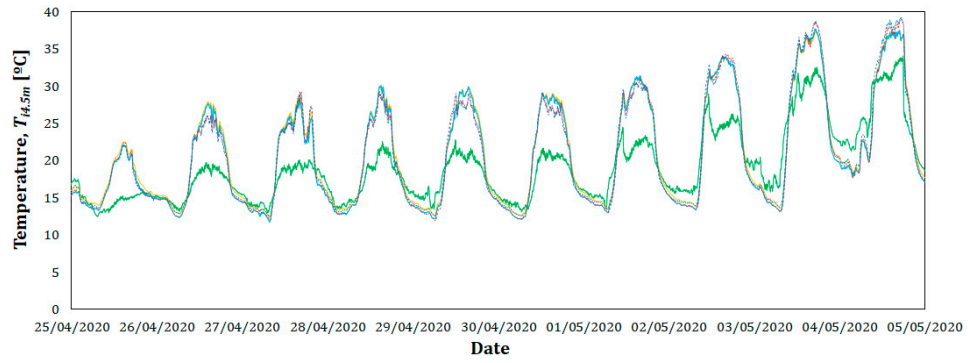

(b)

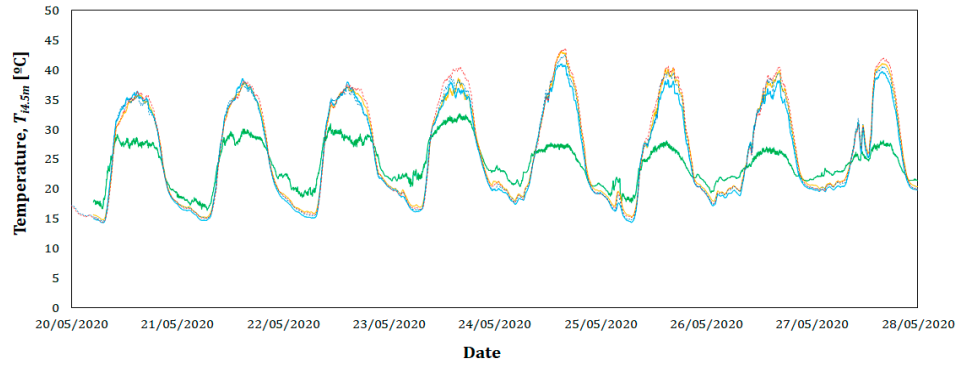

(c)

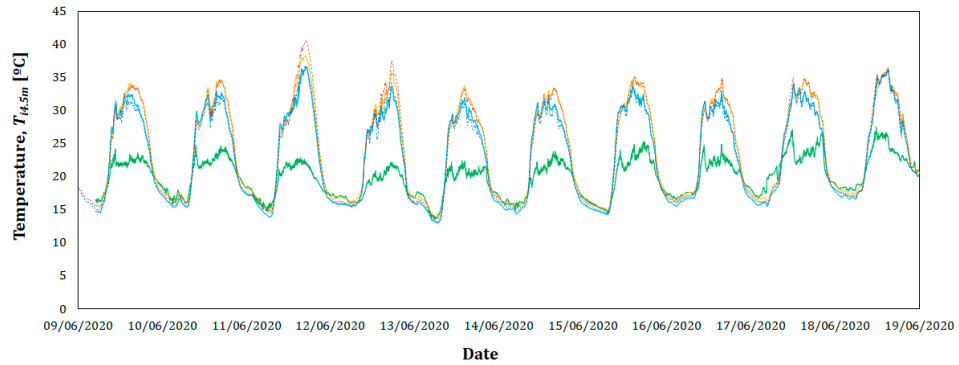

(d)

**Figure S2.** Evolution of air temperatures outside (—) and inside the East sector with diffuse commercial cover film on the North (—) and South (---) sides and inside the West sector with diffuse experimental cover film on the North (—) and South (---) sides at a height of 4.5 m above the floor.

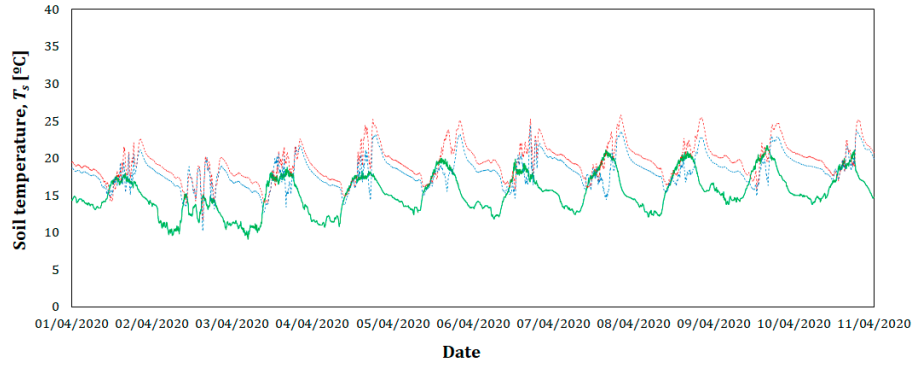

(a)

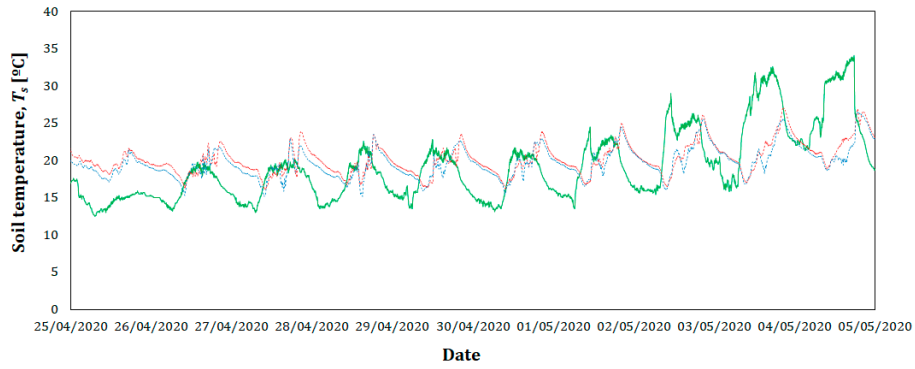

(b)

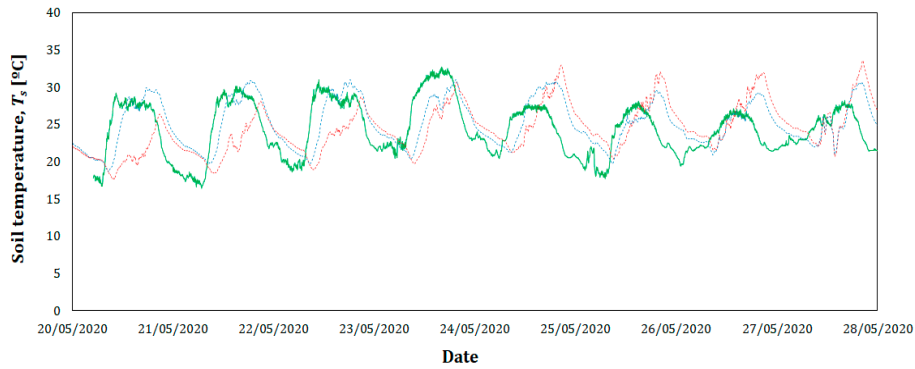

(c)

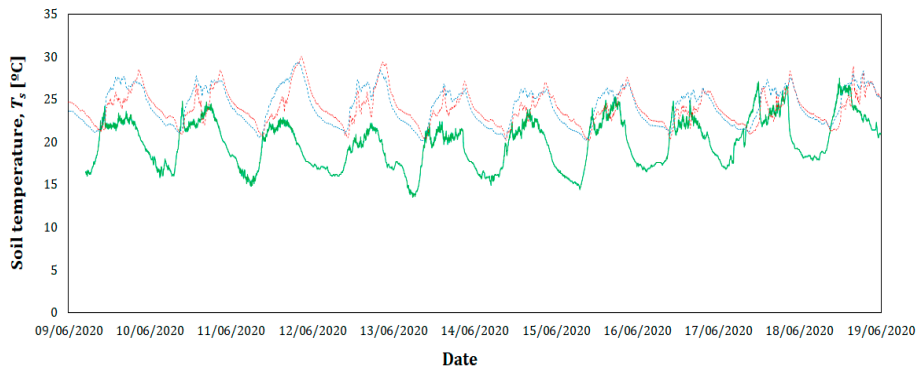

(d)

**Figure S3.** Evolution of the outside air temperature (—) and soil surface temperature in the center of the East sector with diffuse commercial cover film (---) and in the West sector with diffuse experimental cover film (- - -).

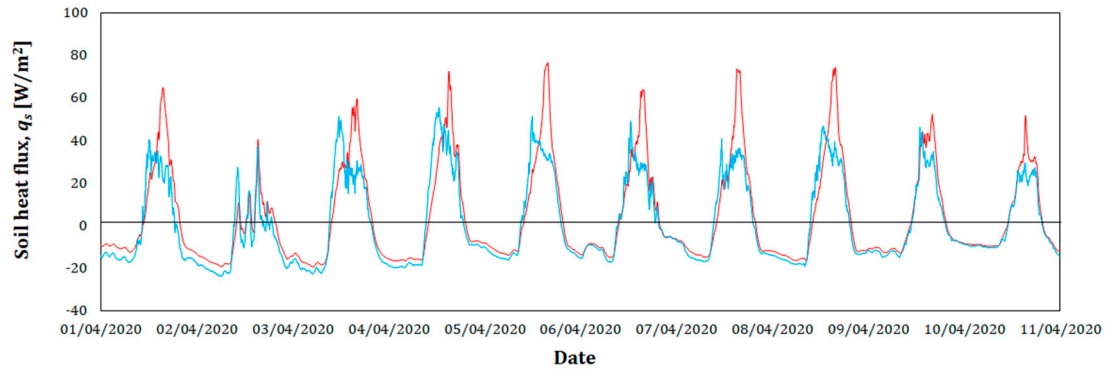

(a)

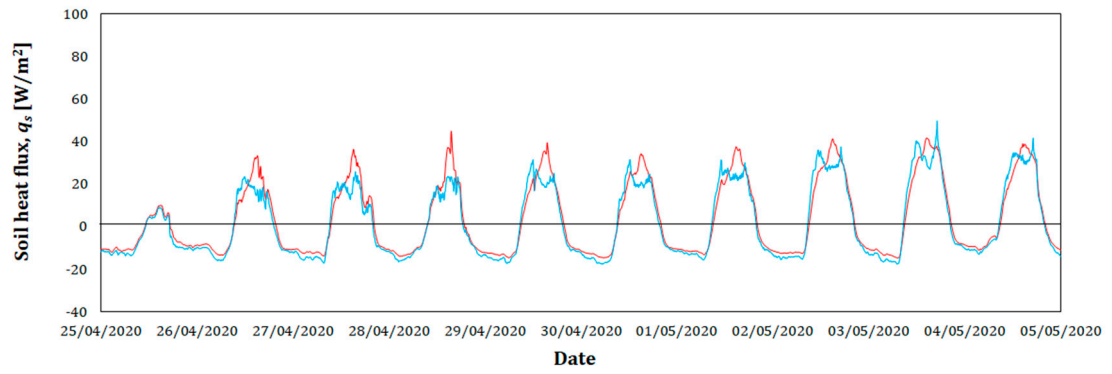

(b)

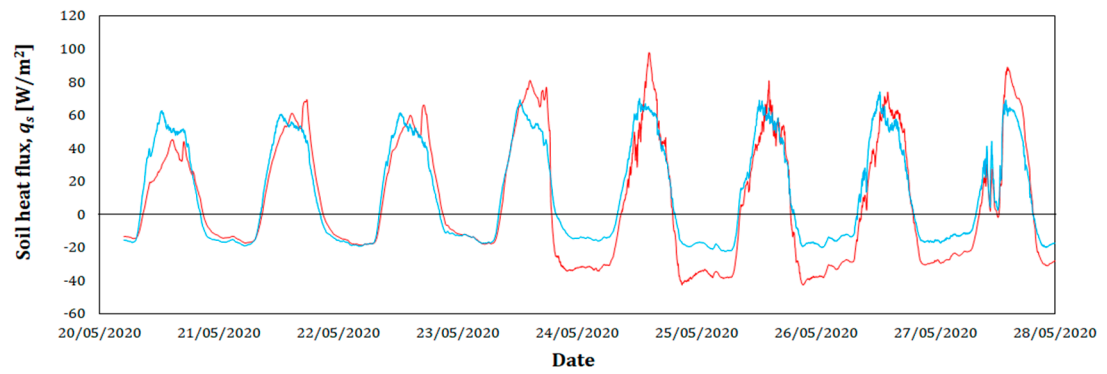

(c)

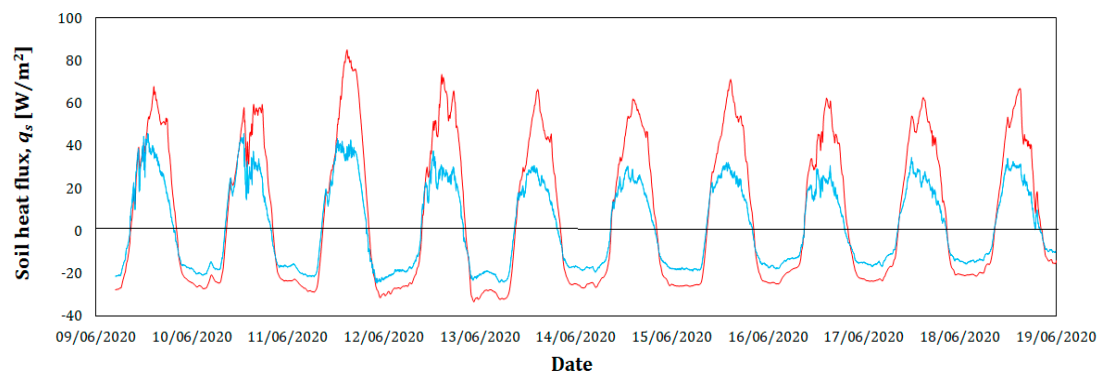

(d)

**Figure S4.** Evolution of the soil heat flux in the center of the East sector with diffuse commercial cover film (---) and in the West sector with diffuse experimental cover film (---).

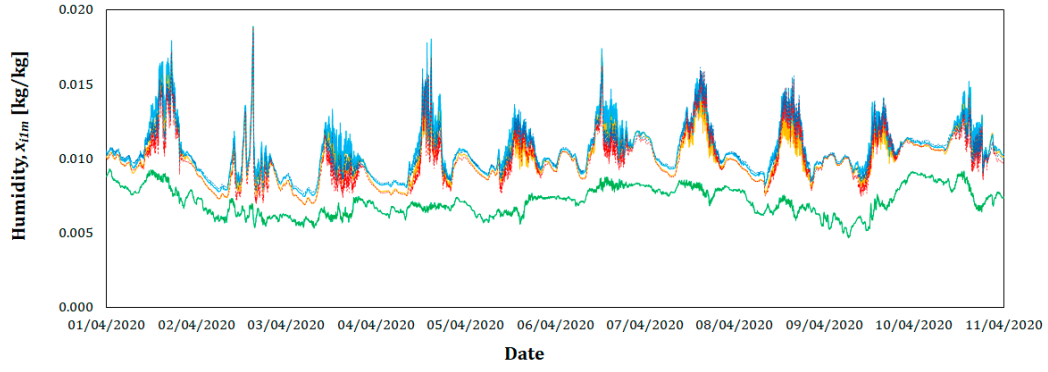

(a)

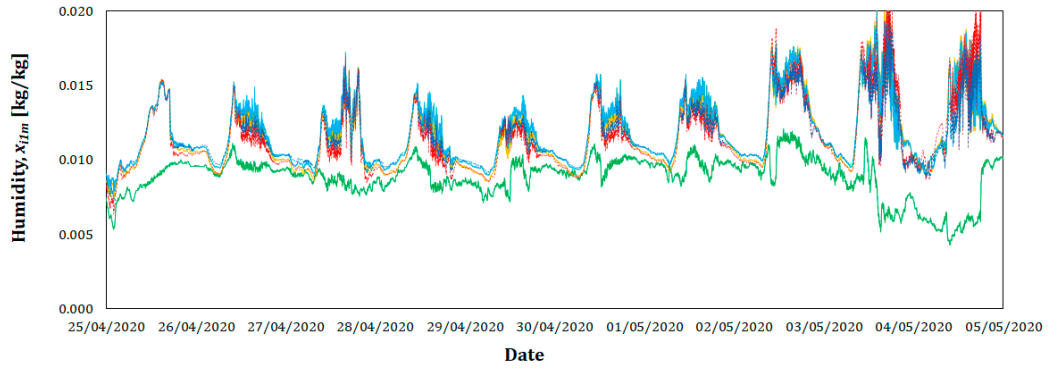

(b)

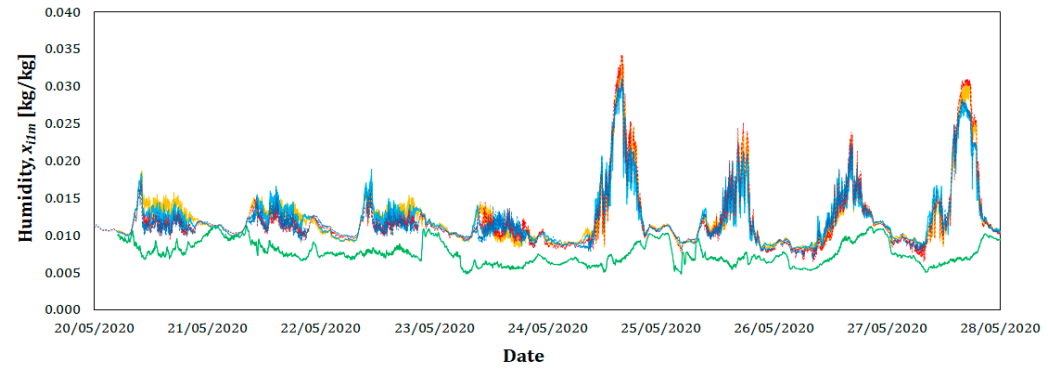

(c)

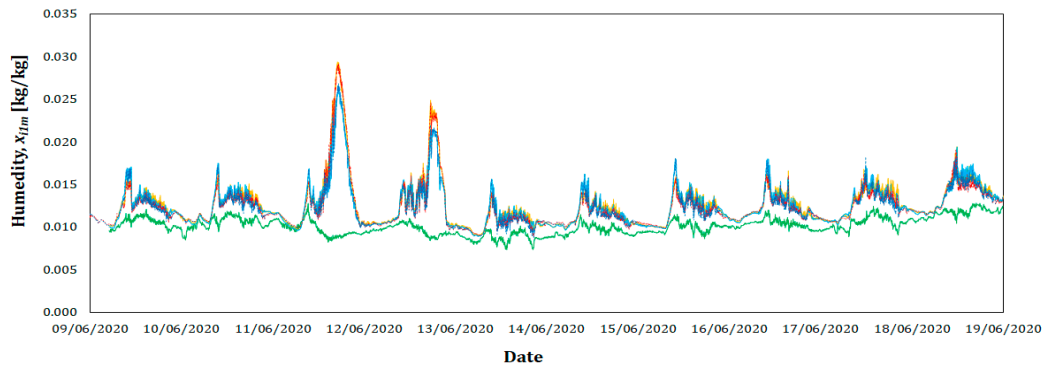

(d)

**Figure S5.** Evolution of the absolute humidity in the air outside (—) and inside the East sector with diffuse commercial cover film on the North (—) and South (---) sides and inside the West sector with diffuse experimental cover film on the North (—) and South (---) sides at a height of 1 m above the floor.

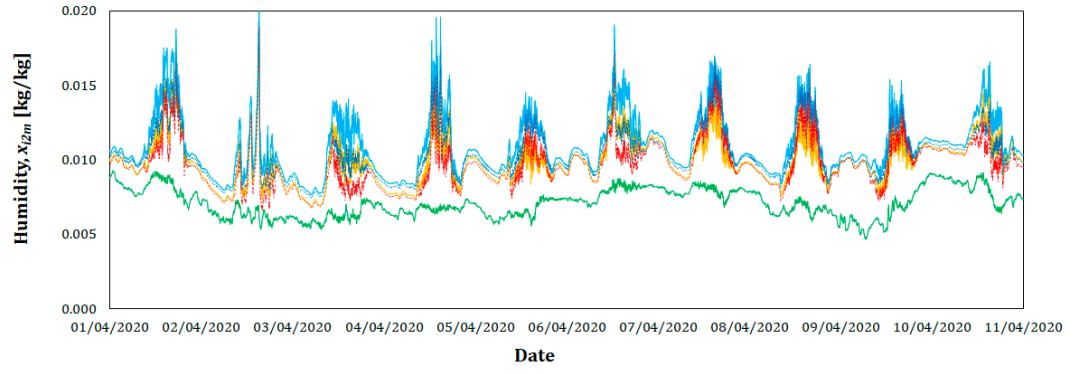

(a)

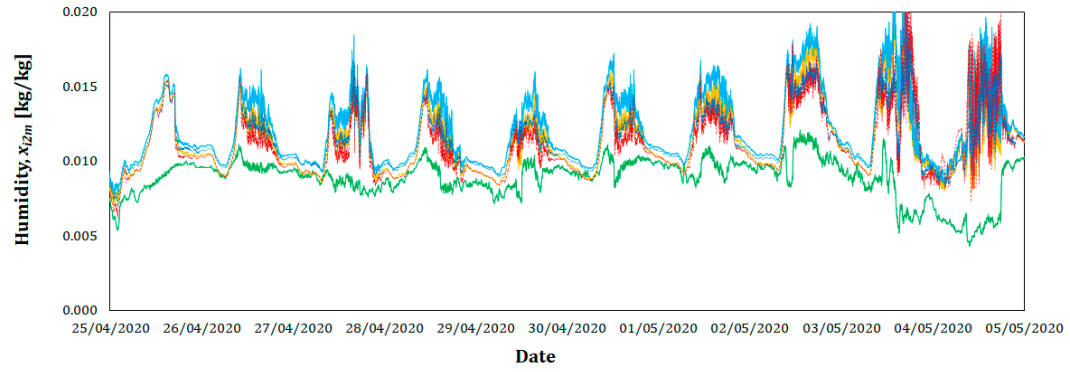

(b)

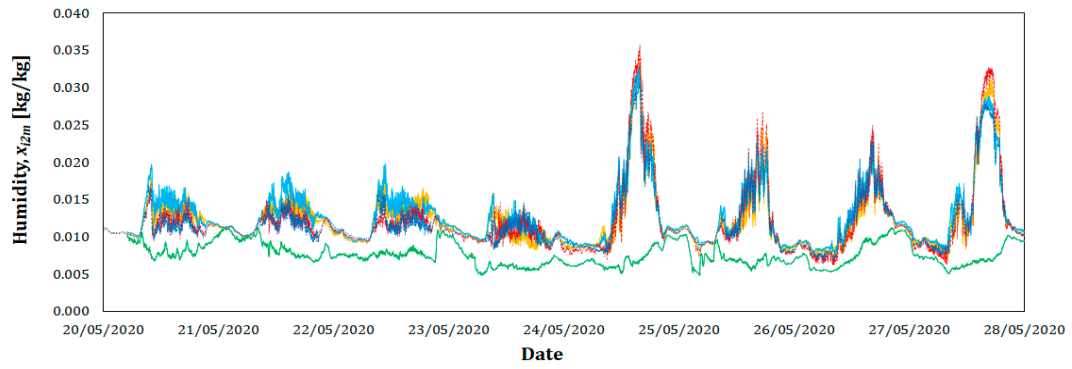

(c)

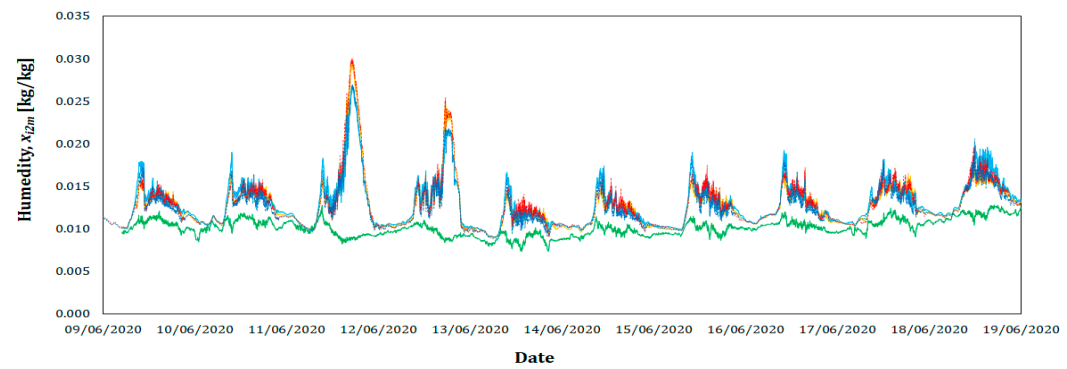

(d)

**Figure S6.** Evolution of the absolute humidity of the air outside (—) and inside the East sector with diffuse commercial cover film on the North (—) and South (---) sides and inside the West sector with diffuse experimental cover film on the North (—) and South (---) sides at a height of 2 m above the floor.



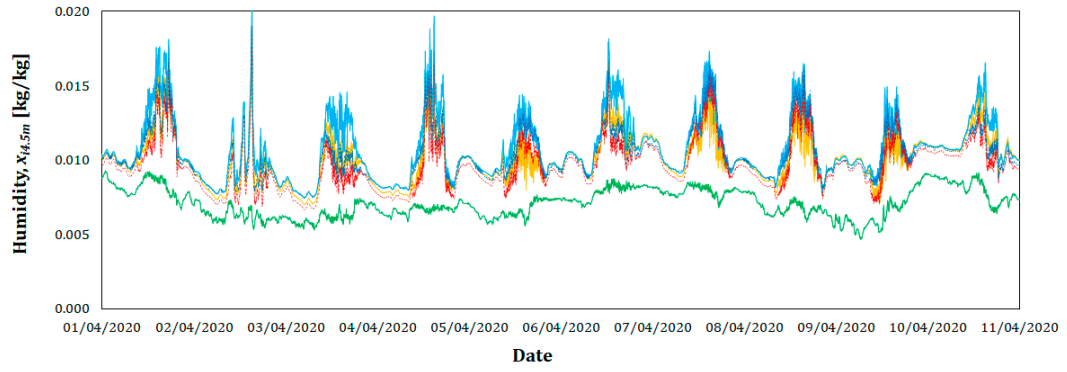

(a)

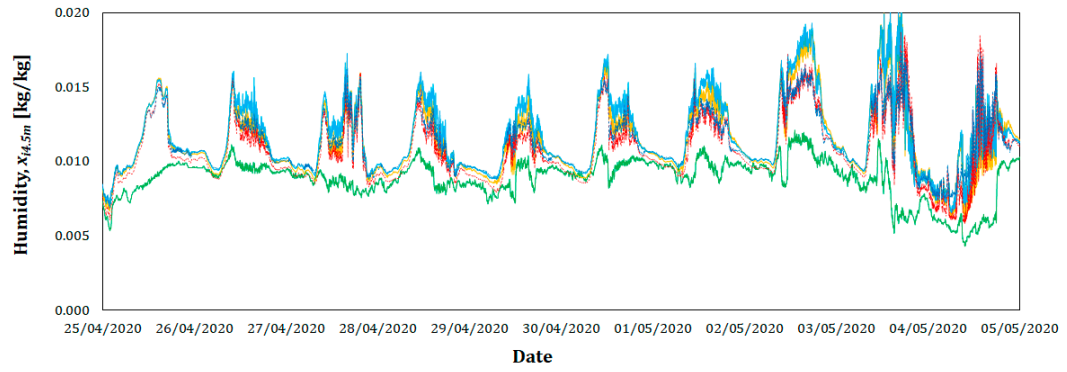

(b)

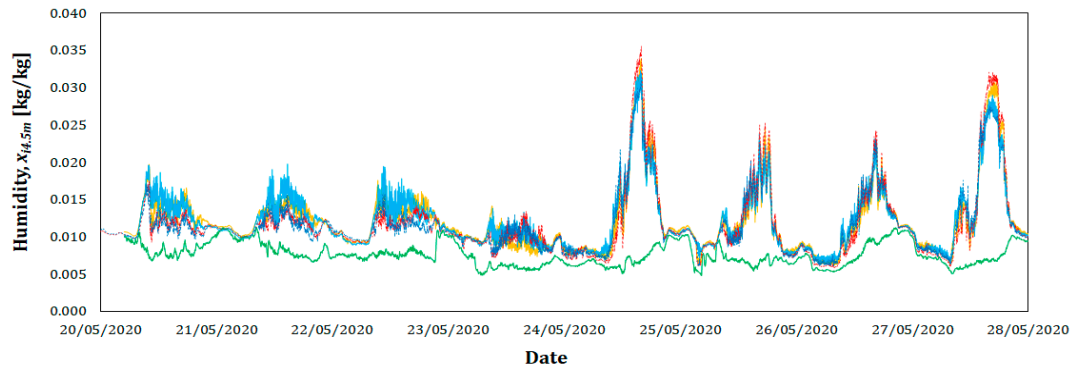

(c)

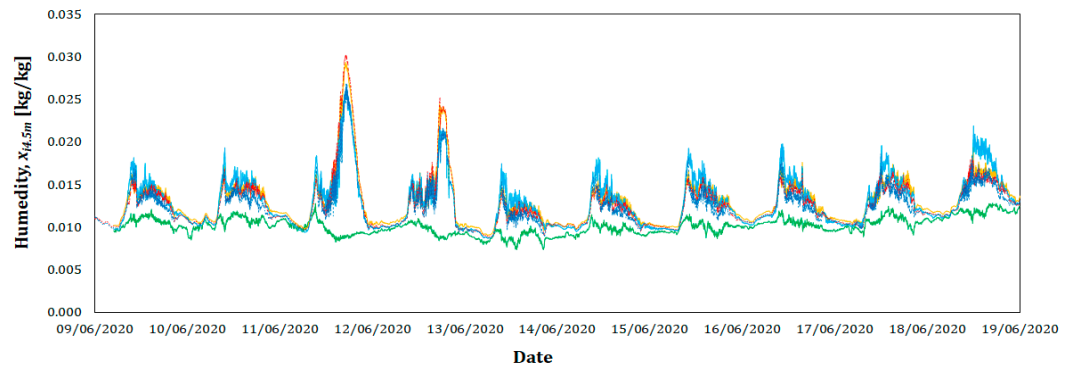

(d)

**Figure S7.** Evolution of the absolute humidity of the air outside (—) and inside the East sector with diffuse commercial cover film on the North (—) and South (- -) sides and inside the West sector with diffuse experimental cover film on the North (—) and South (- -) sides at a height of 4.5 m above the floor.

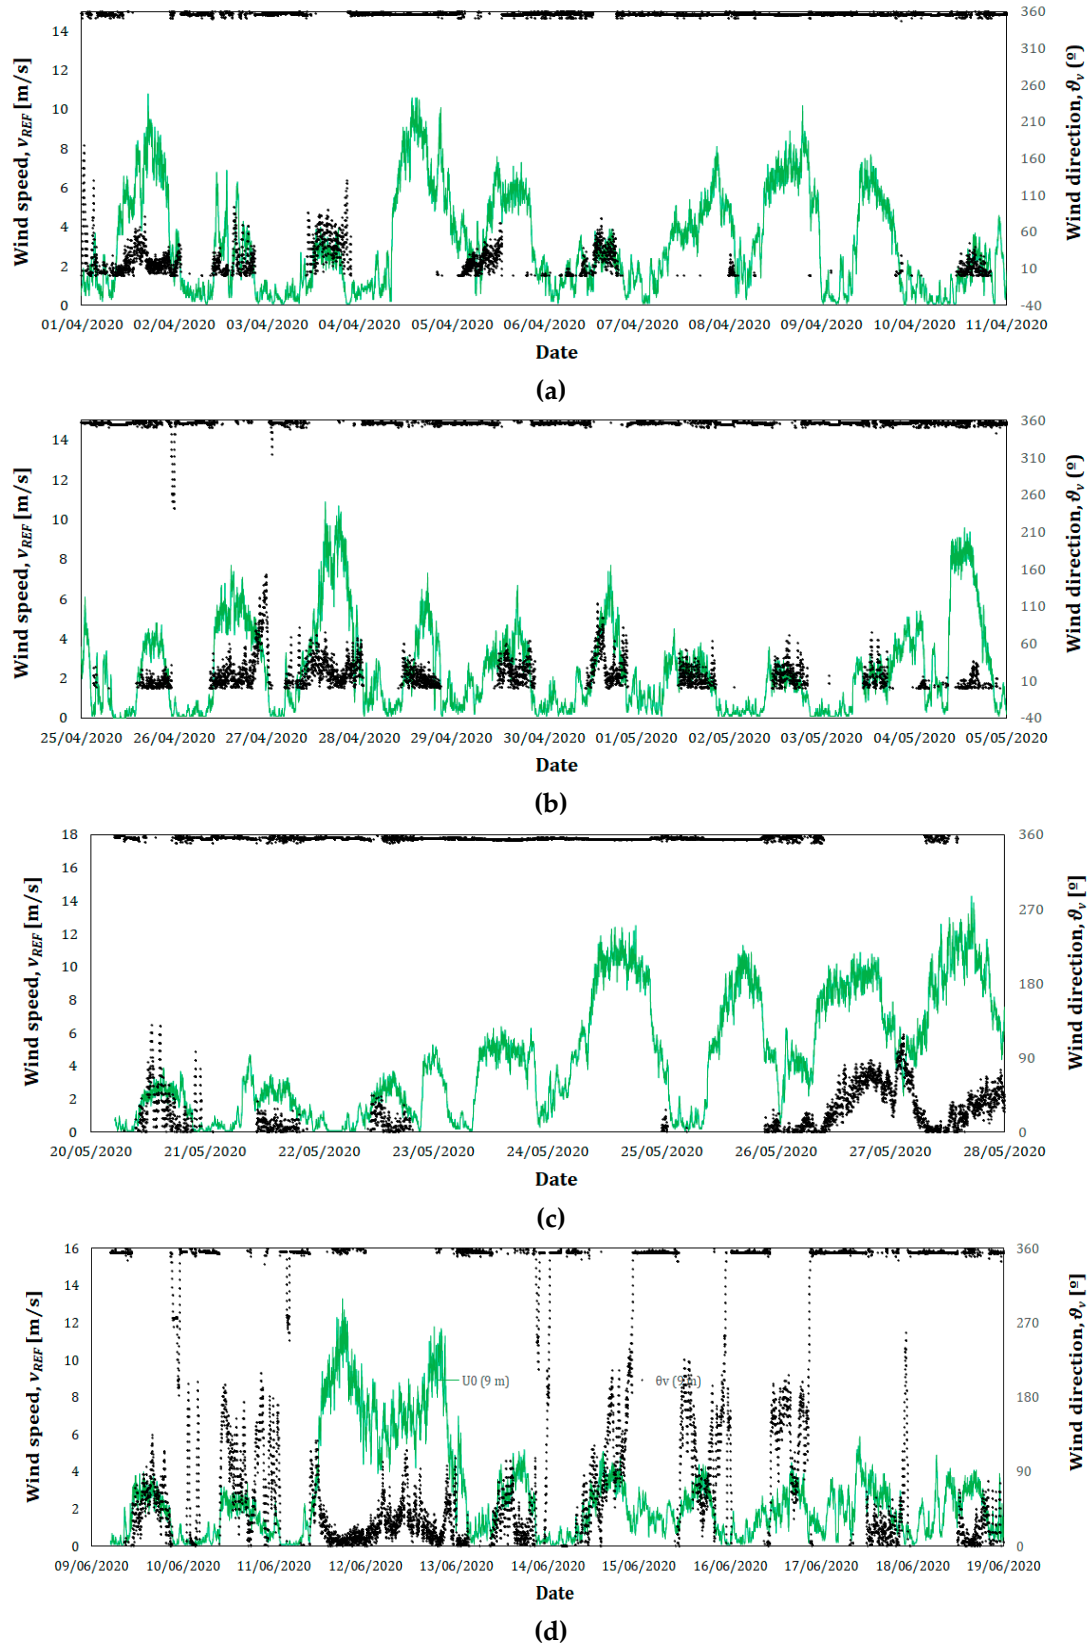

Figure S8. Evolution of the wind speed (—) and direction (—) at a height of 9 m above the floor.
